# Supplementary material for: Analysis of Leukocyte Subpopulations by Flow Cytometry during Hospitalization Depending on the Severity of COVID-19 Course
Source: MDPI journal article supplement (doi:10.3390/biomedicines11102728), 2023-10-08
Supplement: s1 [file s1]

## *Supplementary Material*

### **The cells subpopulation results of flow cytometry depending on the severity of the COVID-19 course**

**Elżbieta Rutkowska<sup>1\*</sup>, Iwona Kwiecień<sup>1</sup>, Ewa Pietruszka<sup>2</sup>, Piotr Rzepecki<sup>3</sup>, Karina Jahnz-Różyk<sup>2</sup>**

**\* Correspondence:** Elżbieta Rutkowska [erutkowska@wim.mil.pl](mailto:erutkowska@wim.mil.pl)

#### **1      Supplementary Table**

**Table S1.** Changes in flow cytometry results during hospitalization and during the visit 3 months after hospitalization

| Parameter            | The course of COVID | n  | Results in T0 |        |        |        |        | Results in T1 |        |        |        |        | T1 - T0   |
|----------------------|---------------------|----|---------------|--------|--------|--------|--------|---------------|--------|--------|--------|--------|-----------|
|                      |                     |    | Mean          | SD     | Median | Q1     | Q3     | Mean          | SD     | Median | Q1     | Q3     | * p< 0.05 |
| WBC                  | non-severe          | 10 | 7821.0        | 2431.8 | 8060.0 | 5507.5 | 9672.5 | 6002.0        | 1525.0 | 5785.0 | 5007.5 | 6502.5 | 0.067     |
|                      | severe              | 7  | 5811.4        | 2955.5 | 4840.0 | 4030.0 | 5815.0 | 5965.7        | 1235.4 | 6060.0 | 5505.0 | 6540.0 | 0.901     |
| lymphocytes          | non-severe          | 10 | 25.2          | 14.2   | 21.1   | 16.0   | 28.3   | 34.3          | 9.5    | 34.6   | 26.9   | 38.4   | 0.085     |
|                      | severe              | 7  | 34.4          | 9.5    | 37.3   | 33.3   | 39.1   | 30.5          | 5.0    | 29.3   | 27.6   | 31.0   | 0.282     |
| T lymphocytes        | non-severe          | 10 | 18.4          | 12.7   | 14.9   | 10.5   | 19.6   | 27.4          | 8.7    | 27.6   | 20.5   | 33.9   | 0.065     |
|                      | severe              | 7  | 27.8          | 8.1    | 29.2   | 26.7   | 31.0   | 24.6          | 5.1    | 23.5   | 21.5   | 25.8   | 0.271     |
| CD4 T cells          | non-severe          | 10 | 12.0          | 9.5    | 7.6    | 6.1    | 13.6   | 15.8          | 4.8    | 15.1   | 13.6   | 17.8   | 0.189     |
|                      | severe              | 7  | 17.9          | 6.1    | 19.1   | 16.2   | 20.9   | 13.3          | 3.3    | 13.4   | 11.9   | 15.5   | 0.063     |
| CD8 T cells          | non-severe          | 10 | 5.8           | 3.4    | 6.1    | 3.3    | 6.6    | 10.9          | 5.6    | 9.1    | 6.4    | 13.4   | *0.019    |
|                      | severe              | 7  | 9.0           | 6.3    | 7.5    | 4.9    | 10.9   | 10.9          | 5.7    | 10.1   | 8.4    | 12.6   | 0.094     |
| CD4/CD8              | non-severe          | 10 | 2.2           | 1.0    | 2.3    | 1.4    | 3.0    | 1.7           | 0.8    | 1.5    | 1.0    | 2.6    | *0.002    |
|                      | severe              | 7  | 2.9           | 2.2    | 2.6    | 1.2    | 4.1    | 1.8           | 1.7    | 1.5    | 0.8    | 1.8    | 0.067     |
| natural killer cells | non-severe          | 10 | 3.2           | 1.6    | 2.9    | 2.2    | 4.4    | 4.0           | 1.4    | 3.8    | 2.7    | 5.2    | 0.070     |
|                      | severe              | 7  | 3.0           | 1.4    | 3.0    | 2.0    | 4.1    | 3.6           | 1.5    | 3.1    | 2.7    | 3.8    | 0.406     |

| Parameter                | The course of COVID | n  | Results in T0 |      |        |      |      | Results in T1 |      |        |      |      | T1 - T0   |
|--------------------------|---------------------|----|---------------|------|--------|------|------|---------------|------|--------|------|------|-----------|
|                          |                     |    | Mean          | SD   | Median | Q1   | Q3   | Mean          | SD   | Median | Q1   | Q3   | * p< 0.05 |
| B lymphocytes            | non-severe          | 10 | 3.7           | 2.0  | 2.7    | 2.3  | 4.6  | 2.8           | 1.3  | 2.8    | 2.2  | 3.1  | 0.062     |
|                          | severe              | 7  | 3.6           | 1.5  | 3.2    | 2.7  | 4.4  | 2.2           | 0.8  | 2.1    | 1.9  | 2.8  | 0.098     |
| neutrophils              | non-severe          | 10 | 66.9          | 16.2 | 71.0   | 64.6 | 77.5 | 55.6          | 8.9  | 55.2   | 50.0 | 64.3 | *0.041    |
|                          | severe              | 7  | 55.5          | 11.0 | 55.5   | 50.2 | 57.5 | 59.3          | 6.0  | 58.8   | 57.7 | 63.6 | 0.388     |
| eosinophils              | non-severe          | 10 | 1.0           | 1.7  | 0.2    | 0.1  | 0.9  | 3.1           | 2.6  | 2.0    | 1.7  | 3.8  | *0.002    |
|                          | severe              | 7  | 3.5           | 2.5  | 3.7    | 2.0  | 4.3  | 3.1           | 1.4  | 3.4    | 2.5  | 3.8  | 0.604     |
| basophils                | non-severe          | 10 | 0.4           | 0.3  | 0.3    | 0.2  | 0.6  | 0.7           | 0.3  | 0.8    | 0.4  | 0.9  | *0.028    |
|                          | severe              | 7  | 0.9           | 0.6  | 1.2    | 0.5  | 1.4  | 0.6           | 0.5  | 0.6    | 0.2  | 0.8  | 0.187     |
| monocytes                | non-severe          | 10 | 6.8           | 1.7  | 6.5    | 5.9  | 6.7  | 6.3           | 1.5  | 6.1    | 5.7  | 6.9  | 0.527     |
|                          | severe              | 7  | 6.0           | 2.0  | 6.0    | 4.7  | 7.8  | 6.7           | 1.5  | 6.6    | 6.0  | 7.8  | 0.332     |
| CD16+ monocytes          | non-severe          | 10 | 11.0          | 7.6  | 7.4    | 6.4  | 15.4 | 15.2          | 6.9  | 15.7   | 11.8 | 20.3 | 0.316     |
|                          | severe              | 7  | 16.6          | 7.6  | 15.6   | 11.7 | 17.2 | 18.2          | 7.1  | 18.6   | 16.5 | 23.2 | 0.624     |
| Lymphocytes T (%/L)      | non-severe          | 10 | 70.1          | 8.9  | 69.7   | 67.2 | 74.1 | 79.2          | 7.0  | 80.4   | 75.1 | 83.2 | *0.002    |
|                          | severe              | 7  | 80.6          | 4.0  | 80.0   | 78.3 | 82.8 | 80.5          | 6.8  | 81.9   | 80.2 | 85.0 | 0.970     |
| Lymphocytes T CD4+ (%/L) | non-severe          | 10 | 44.1          | 10.8 | 42.1   | 38.8 | 49.9 | 46.0          | 8.6  | 45.3   | 40.0 | 53.0 | 0.339     |
|                          | severe              | 7  | 52.0          | 12.3 | 51.3   | 41.8 | 62.7 | 44.0          | 10.9 | 47.7   | 35.7 | 53.4 | *0.017    |
| Lymphocytes T CD8+ (%/L) | non-severe          | 10 | 23.3          | 8.3  | 23.0   | 15.9 | 28.7 | 30.7          | 10.6 | 29.6   | 21.8 | 36.3 | <0.001    |

| Parameter               | The course of COVID | n  | Results in T0 |       |        |        |        | Results in T1 |       |        |        |        | T1 - T0   |
|-------------------------|---------------------|----|---------------|-------|--------|--------|--------|---------------|-------|--------|--------|--------|-----------|
|                         |                     |    | Mean          | SD    | Median | Q1     | Q3     | Mean          | SD    | Median | Q1     | Q3     | * p< 0.05 |
|                         | severe              | 7  | 26.1          | 13.6  | 23.5   | 16.0   | 35.1   | 35.0          | 14.5  | 32.5   | 30.3   | 44.9   | *0.011    |
| NK cells (%/L)          | non-severe          | 10 | 14.4          | 9.2   | 12.2   | 9.8    | 12.7   | 12.4          | 5.9   | 10.5   | 7.8    | 15.0   | 0.269     |
|                         | severe              | 7  | 8.8           | 3.1   | 7.8    | 6.9    | 11.2   | 12.1          | 5.5   | 9.9    | 8.6    | 13.5   | 0.116     |
| Lymphocytes B (%/L)     | non-severe          | 10 | 15.4          | 5.2   | 14.6   | 12.3   | 19.5   | 8.4           | 2.6   | 9.0    | 7.8    | 9.7    | *0.002    |
|                         | severe              | 7  | 10.5          | 3.3   | 11.0   | 8.0    | 12.4   | 7.6           | 2.5   | 7.3    | 6.3    | 9.5    | 0.108     |
| T lymphocytes (k/ul)    | non-severe          | 10 | 1249.0        | 454.6 | 1269.6 | 1082.8 | 1377.3 | 1668.3        | 865.4 | 1446.4 | 1161.3 | 1874.8 | 0.211     |
|                         | severe              | 7  | 1589.5        | 987.2 | 1248.4 | 1208.1 | 1448.5 | 1462.4        | 419.3 | 1339.3 | 1199.5 | 1616.7 | 0.774     |
| CD4+ lymphocytes (k/ul) | non-severe          | 10 | 789.7         | 364.0 | 674.0  | 545.4  | 996.3  | 949.6         | 421.1 | 780.9  | 730.2  | 1040.1 | 0.370     |
|                         | severe              | 7  | 1097.3        | 930.4 | 767.8  | 650.4  | 1021.1 | 770.0         | 157.9 | 830.8  | 738.9  | 868.2  | 0.383     |
| CD8+ lymphocytes (k/ul) | non-severe          | 10 | 415.3         | 188.2 | 398.7  | 308.5  | 570.1  | 672.4         | 486.4 | 452.4  | 379.2  | 849.3  | 0.106     |
|                         | severe              | 7  | 449.6         | 220.3 | 377.5  | 321.1  | 562.5  | 663.7         | 396.7 | 569.5  | 419.8  | 858.8  | 0.064     |
| NK cells (k/ul)         | non-severe          | 10 | 233.9         | 143.9 | 217.0  | 179.3  | 233.9  | 244.2         | 107.6 | 241.1  | 151.2  | 328.5  | 0.813     |
|                         | severe              | 7  | 153.9         | 49.7  | 169.7  | 115.5  | 195.0  | 215.8         | 94.9  | 197.8  | 152.9  | 259.4  | 0.205     |
| B lymphocytes (k/ul)    | non-severe          | 10 | 262.9         | 99.9  | 238.8  | 212.3  | 310.8  | 175.3         | 101.8 | 134.3  | 123.6  | 214.4  | *0.007    |
|                         | severe              | 7  | 228.6         | 224.4 | 128.6  | 117.3  | 197.8  | 134.8         | 54.3  | 163.8  | 88.3   | 175.6  | 0.350     |

**Table S2.** Changes in flow cytometry results during the visit 3 months after hospitalization (T1) and during the visit 6 months after hospitalization (T2).

| Parameter            | The course of COVID | n  | Results in T1 |        |        |        |        | Results in T2 |        |        |        |        | T2 - T1   |
|----------------------|---------------------|----|---------------|--------|--------|--------|--------|---------------|--------|--------|--------|--------|-----------|
|                      |                     |    | Mean          | SD     | Median | Q1     | Q3     | Mean          | SD     | Median | Q1     | Q3     | * p< 0.05 |
| WBC                  | non-severe          | 14 | 6055.0        | 1750.2 | 5785.0 | 4825.0 | 6592.5 | 6885.0        | 2690.6 | 5860.0 | 5645.0 | 7337.5 | 0.108     |
|                      | severe              | 3  | 7640.0        | 6833.2 | 4490.0 | 3720.0 | 9985.0 | 6606.7        | 553.0  | 6540.0 | 6315.0 | 6865.0 | 0.805     |
| lymphocytes          | non-severe          | 14 | 34.8          | 11.7   | 32.9   | 26.9   | 42.8   | 37.3          | 12.7   | 42.3   | 28.4   | 46.6   | 0.401     |
|                      | severe              | 3  | 27.4          | 16.2   | 25.1   | 18.8   | 34.9   | 27.4          | 2.1    | 27.8   | 26.5   | 28.6   | 1,000     |
| T lymphocytes        | non-severe          | 14 | 27.7          | 10.1   | 25.3   | 20.5   | 34.2   | 29.3          | 11.2   | 31.5   | 22.3   | 37.1   | 0.582     |
|                      | severe              | 3  | 20.2          | 14.8   | 21.7   | 13.2   | 28.0   | 20.7          | 3.1    | 19.1   | 18.9   | 21.7   | 0.958     |
| CD4 T cells          | non-severe          | 10 | 12.0          | 9.5    | 7.6    | 6.1    | 13.6   | 15.8          | 4.8    | 15.1   | 13.6   | 17.8   | 0.189     |
|                      | severe              | 7  | 17.9          | 6.1    | 19.1   | 16.2   | 20.9   | 13.3          | 3.3    | 13.4   | 11.9   | 15.5   | 0.063     |
| CD8 T cells          | non-severe          | 14 | 10.0          | 5.2    | 9.1    | 6.0    | 13.2   | 10.3          | 5.3    | 8.8    | 6.1    | 14.3   | 0.874     |
|                      | severe              | 3  | 7.1           | 4.5    | 8.6    | 5.3    | 9.6    | 8.3           | 1.7    | 8.7    | 7.6    | 9.2    | 0.763     |
| CD4/CD8              | non-severe          | 14 | 1.9           | 0.7    | 1.9    | 1.1    | 2.7    | 2.0           | 0.8    | 2.0    | 1.4    | 2.2    | 0.834     |
|                      | severe              | 3  | 1.6           | 0.3    | 1.5    | 1.5    | 1.8    | 1.4           | 0.5    | 1.7    | 1.3    | 1.7    | 0.438     |
| natural killer cells | non-severe          | 14 | 3.9           | 1.4    | 3.7    | 2.6    | 4.7    | 4.1           | 1.9    | 3.7    | 3.0    | 4.6    | 0.568     |
|                      | severe              | 3  | 5.5           | 3.3    | 4.7    | 3.7    | 6.9    | 5.7           | 3.3    | 5.6    | 4.0    | 7.3    | 0.938     |

| Parameter                | The course of COVID | n  | Results in T1 |      |        |      |      | Results in T2 |      |        |      |      | T2 - T1   |
|--------------------------|---------------------|----|---------------|------|--------|------|------|---------------|------|--------|------|------|-----------|
|                          |                     |    | Mean          | SD   | Median | Q1   | Q3   | Mean          | SD   | Median | Q1   | Q3   | * p< 0.05 |
| B lymphocytes            | non-severe          | 14 | 3.2           | 1.6  | 2.8    | 2.3  | 4.3  | 3.9           | 1.7  | 4.0    | 3.0  | 5.0  | 0.148     |
|                          | severe              | 3  | 1.8           | 1.2  | 1.4    | 1.1  | 2.3  | 1.1           | 0.6  | 1.1    | 0.8  | 1.4  | 0.317     |
| neutrophils              | non-severe          | 14 | 56.3          | 11.5 | 59.4   | 48.6 | 64.1 | 52.5          | 14.3 | 47.8   | 45.3 | 60.6 | 0.227     |
|                          | severe              | 3  | 66.4          | 18.6 | 70.3   | 58.2 | 76.5 | 61.8          | 4.1  | 59.7   | 59.5 | 63.2 | 0.762     |
| eosinophils              | non-severe          | 14 | 2.5           | 1.8  | 2.0    | 1.6  | 2.6  | 2.2           | 1.5  | 2.0    | 1.1  | 3.3  | 0.489     |
|                          | severe              | 3  | 1.8           | 1.3  | 1.7    | 1.2  | 2.5  | 1.4           | 1.1  | 1.5    | 0.9  | 2.0  | 0.636     |
| basophils                | non-severe          | 14 | 0.7           | 0.3  | 0.7    | 0.5  | 0.9  | 0.7           | 0.5  | 0.7    | 0.5  | 0.9  | 0.791     |
|                          | severe              | 3  | 0.2           | 0.2  | 0.1    | 0.1  | 0.3  | 0.6           | 0.5  | 0.6    | 0.4  | 0.9  | 0.195     |
| monocytes                | non-severe          | 14 | 5.8           | 1.4  | 6.0    | 5.3  | 6.8  | 6.8           | 2.2  | 7.2    | 4.9  | 9.0  | 0.054     |
|                          | severe              | 3  | 5.1           | 0.9  | 5.2    | 4.7  | 5.6  | 8.7           | 2.0  | 8.9    | 7.8  | 9.8  | 0.160     |
| CD16+ monocytes          | non-severe          | 14 | 14.9          | 8.8  | 15.5   | 10.0 | 20.3 | 9.2           | 5.4  | 10.4   | 4.9  | 11.2 | 0.084     |
|                          | severe              | 3  | 13.3          | 9.2  | 12.3   | 8.5  | 17.6 | 10.3          | 4.8  | 9.4    | 7.7  | 12.5 | 0.712     |
| Lymphocytes T (%/L)      | non-severe          | 14 | 78.9          | 5.3  | 79.0   | 75.1 | 81.4 | 77.0          | 6.4  | 76.8   | 71.5 | 81.6 | 0.397     |
|                          | severe              | 3  | 66.8          | 25.8 | 76.5   | 57.1 | 81.5 | 75.6          | 11.8 | 75.6   | 69.7 | 81.5 | 0.421     |
| Lymphocytes T CD4+ (%/L) | non-severe          | 14 | 48.4          | 6.3  | 49.1   | 41.7 | 53.1 | 48.1          | 7.4  | 47.9   | 43.3 | 51.6 | 0.831     |

| Parameter                | The course of COVID | n  | Results in T1 |       |        |        |        | Results in T2 |       |        |        |        | T2 - T1   |
|--------------------------|---------------------|----|---------------|-------|--------|--------|--------|---------------|-------|--------|--------|--------|-----------|
|                          |                     |    | Mean          | SD    | Median | Q1     | Q3     | Mean          | SD    | Median | Q1     | Q3     | * p< 0.05 |
|                          | severe              | 3  | 39.9          | 15.7  | 47.8   | 34.8   | 48.9   | 42.7          | 11.6  | 43.5   | 37.1   | 48.7   | 0.538     |
| Lymphocytes T CD8+ (%/L) | non-severe          | 14 | 27.7          | 8.4   | 24.8   | 21.4   | 36.0   | 26.9          | 8.0   | 24.5   | 20.1   | 34.7   | 0.731     |
|                          | severe              | 3  | 24.5          | 9.2   | 23.7   | 19.8   | 28.9   | 29.9          | 4.1   | 31.3   | 28.3   | 32.2   | 0.472     |
| NK cells (%/L)           | non-severe          | 14 | 11.6          | 3.9   | 10.8   | 9.8    | 14.2   | 12.3          | 6.4   | 10.8   | 8.0    | 15.3   | 0.641     |
|                          | severe              | 3  | 22.7          | 13.6  | 20.3   | 15.4   | 28.8   | 20.6          | 11.2  | 22.4   | 15.5   | 26.6   | 0.486     |
| Lymphocytes B (%/L)      | non-severe          | 14 | 9.4           | 3.3   | 9.0    | 7.7    | 11.1   | 10.7          | 4.6   | 9.6    | 8.5    | 11.8   | 0.365     |
|                          | severe              | 3  | 10.5          | 12.7  | 3.2    | 3.2    | 14.2   | 3.8           | 1.8   | 4.0    | 3.0    | 4.8    | 0.416     |
| T lymphocytes (k/ul)     | non-severe          | 14 | 1696.9        | 856.2 | 1547.9 | 1161.3 | 2048.4 | 1891.0        | 778.1 | 1844.1 | 1331.0 | 2066.0 | 0.447     |
|                          | severe              | 3  | 967.8         | 493.7 | 727.6  | 683.9  | 1131.6 | 1365.6        | 213.8 | 1344.5 | 1253.9 | 1466.9 | 0.422     |
| CD4+ lymphocytes (k/ul)  | non-severe          | 14 | 1006.5        | 410.9 | 953.2  | 738.0  | 1266.6 | 1156.0        | 428.3 | 1111.9 | 949.2  | 1426.8 | 0.318     |
|                          | severe              | 3  | 583.5         | 327.6 | 418.0  | 394.8  | 689.4  | 766.0         | 186.5 | 669.9  | 658.5  | 825.5  | 0.557     |
| CD8+ lymphocytes (k/ul)  | non-severe          | 14 | 637.5         | 466.5 | 474.7  | 363.5  | 738.4  | 678.2         | 377.6 | 591.7  | 464.8  | 834.8  | 0.714     |
|                          | severe              | 3  | 346.4         | 115.6 | 309.6  | 281.7  | 392.8  | 552.1         | 154.5 | 569.0  | 479.4  | 633.2  | 0.298     |
| NK cells (k/ul)          | non-severe          | 14 | 232.9         | 104.0 | 213.6  | 139.9  | 300.9  | 273.0         | 126.4 | 237.4  | 162.2  | 361.7  | 0.119     |
|                          | severe              | 3  | 404.3         | 325.5 | 408.6  | 242.6  | 568.1  | 381.7         | 247.6 | 341.0  | 249.0  | 494.1  | 0.704     |

| Parameter            | The course of COVID | n  | Results in T1 |       |        |       |       | Results in T2 |       |        |       |       | T2 - T1   |
|----------------------|---------------------|----|---------------|-------|--------|-------|-------|---------------|-------|--------|-------|-------|-----------|
|                      |                     |    | Mean          | SD    | Median | Q1    | Q3    | Mean          | SD    | Median | Q1    | Q3    | * p< 0.05 |
| B lymphocytes (k/ul) | non-severe          | 14 | 188.5         | 93.2  | 162.0  | 123.6 | 267.5 | 247.7         | 104.1 | 235.5  | 178.0 | 332.1 | 0.039     |
|                      | severe              | 3  | 188.8         | 252.9 | 62.9   | 43.2  | 271.4 | 72.5          | 42.3  | 71.9   | 51.2  | 93.5  | 0.455     |

**Table S3.** Changes in flow cytometry results during hospitalization (T0) and during the visit 6 months after hospitalization (T2)

| Parameter     | The course of COVID | n  | Results in T0 |        |        |        |         | Results in T2 |        |        |        |        | T2 – T0  |
|---------------|---------------------|----|---------------|--------|--------|--------|---------|---------------|--------|--------|--------|--------|----------|
|               |                     |    | Mean          | SD     | Median | Q1     | Q3      | Mean          | SD     | Median | Q1     | Q3     | *p< 0.05 |
| WBC           | non-severe          | 11 | 8730.9        | 3338.9 | 8900.0 | 6425.0 | 10190.0 | 6648.2        | 1318.3 | 6110.0 | 5735.0 | 6995.0 | *0.036   |
|               | severe              | 2  | 7665.0        | 2566.8 | 7665.0 | 6757.5 | 8572.5  | 6045.0        | 1789.0 | 6045.0 | 5412.5 | 6677.5 | 0.208    |
| lymphocytes   | non-severe          | 11 | 24.6          | 13.8   | 22.4   | 14.5   | 26.5    | 37.7          | 11.1   | 43.9   | 29.8   | 46.3   | *0.006   |
|               | severe              | 2  | 48.7          | 16.2   | 48.7   | 42.9   | 54.4    | 41.4          | 2.6    | 41.4   | 40.4   | 42.3   | 0.586    |
| T lymphocytes | non-severe          | 11 | 18.1          | 12.3   | 16.6   | 9.2    | 19.1    | 29.5          | 8.7    | 32.5   | 23.8   | 35.0   | *0.006   |
|               | severe              | 2  | 39.6          | 14.4   | 39.6   | 34.5   | 44.6    | 34.2          | 3.9    | 34.2   | 32.8   | 35.5   | 0.599    |
| CD4 T cells   | non-severe          | 11 | 12.6          | 9.0    | 10.3   | 6.3    | 14.5    | 19.1          | 5.2    | 20.0   | 16.9   | 22.1   | *0.014   |
|               | severe              | 2  | 19.5          | 3.6    | 19.5   | 18.2   | 20.7    | 18.7          | 1.1    | 18.7   | 18.3   | 19.1   | 0.860    |



| Parameter            | The course of COVID | n  | Results in T0 |      |        |      |      | Results in T2 |      |        |      |      | T2 – T0  |
|----------------------|---------------------|----|---------------|------|--------|------|------|---------------|------|--------|------|------|----------|
|                      |                     |    | Mean          | SD   | Median | Q1   | Q3   | Mean          | SD   | Median | Q1   | Q3   | *p< 0.05 |
| CD8 T cells          | non-severe          | 11 | 4.8           | 3.4  | 3.8    | 2.7  | 5.7  | 9.5           | 4.3  | 8.2    | 5.8  | 13.3 | *0.002   |
|                      | severe              | 2  | 18.2          | 9.0  | 18.2   | 15.0 | 21.3 | 14.9          | 5.0  | 14.9   | 13.1 | 16.6 | 0.448    |
| CD4/CD8              | non-severe          | 11 | 2.7           | 0.9  | 2.6    | 2.4  | 3.2  | 2.3           | 0.8  | 2.0    | 1.8  | 3.0  | *0.009   |
|                      | severe              | 2  | 1.2           | 0.4  | 1.2    | 1.0  | 1.3  | 1.4           | 0.5  | 1.4    | 1.2  | 1.5  | 0.295    |
| natural killer cells | non-severe          | 11 | 2.9           | 2.1  | 2.7    | 1.7  | 4.0  | 4.6           | 2.1  | 4.1    | 3.0  | 5.9  | *0.030   |
|                      | severe              | 2  | 4.2           | 0.1  | 4.2    | 4.2  | 4.3  | 3.6           | 0.8  | 3.6    | 3.3  | 3.9  | 0.442    |
| B lymphocytes        | non-severe          | 11 | 3.6           | 1.7  | 3.3    | 2.5  | 4.3  | 3.5           | 1.3  | 3.7    | 3.0  | 4.4  | 0.962    |
|                      | severe              | 2  | 4.9           | 2.0  | 4.9    | 4.2  | 5.6  | 3.6           | 0.4  | 3.6    | 3.5  | 3.8  | 0.584    |
| neutrophils          | non-severe          | 11 | 67.8          | 16.2 | 70.2   | 64.9 | 78.4 | 52.8          | 12.5 | 49.1   | 45.4 | 61.7 | *0.003   |
|                      | severe              | 2  | 40.7          | 14.4 | 40.7   | 35.6 | 45.7 | 48.7          | 0.1  | 48.7   | 48.6 | 48.7 | 0.574    |
| eosinophils          | non-severe          | 11 | 0.4           | 0.6  | 0.2    | 0.2  | 0.4  | 2.1           | 1.2  | 1.7    | 1.3  | 2.5  | <0.001   |
|                      | severe              | 2  | 1.9           | 0.2  | 1.9    | 1.8  | 1.9  | 1.6           | 0.6  | 1.6    | 1.4  | 1.8  | 0.500    |
| basophils            | non-severe          | 11 | 0.4           | 0.2  | 0.4    | 0.3  | 0.5  | 0.6           | 0.4  | 0.6    | 0.3  | 0.9  | 0.077    |
|                      | severe              | 2  | 1.5           | 0.5  | 1.5    | 1.3  | 1.6  | 0.9           | 0.4  | 0.9    | 0.8  | 1.1  | 0.553    |
| monocytes            | non-severe          | 11 | 7.2           | 2.6  | 6.5    | 5.6  | 7.4  | 6.3           | 2.2  | 5.9    | 4.5  | 8.1  | 0.391    |

| Parameter                | The course of COVID | n  | Results in T0 |        |         |        |        | Results in T2 |       |         |        |        | T2 – T0  |
|--------------------------|---------------------|----|---------------|--------|---------|--------|--------|---------------|-------|---------|--------|--------|----------|
|                          |                     |    | Mean          | SD     | Media n | Q1     | Q3     | Mean          | SD    | Media n | Q1     | Q3     | *p< 0.05 |
|                          | severe              | 2  | 7.0           | 3.2    | 7.0     | 5.8    | 8.1    | 7.5           | 2.7   | 7.5     | 6.6    | 8.5    | 0.361    |
| CD16+ monocytes          | non-severe          | 11 | 10.0          | 7.1    | 6.9     | 5.6    | 10.7   | 8.7           | 5.3   | 10.3    | 3.7    | 11.1   | 0.691    |
|                          | severe              | 2  | 20.7          | 2.8    | 20.7    | 19.7   | 21.6   | 17.7          | 2.1   | 17.7    | 16.9   | 18.4   | 0.105    |
| Lymphocytes T (%/L)      | non-severe          | 11 | 70.9          | 9.4    | 70.2    | 66.5   | 74.9   | 78.4          | 4.2   | 77.9    | 76.8   | 82.0   | *0.016   |
|                          | severe              | 2  | 80.8          | 2.6    | 80.8    | 79.8   | 81.7   | 82.5          | 4.3   | 82.5    | 80.9   | 84.0   | 0.391    |
| Lymphocytes T CD4+ (%/L) | non-severe          | 11 | 48.2          | 10.3   | 45.8    | 39.9   | 55.6   | 51.8          | 6.6   | 51.2    | 48.1   | 56.4   | 0.169    |
|                          | severe              | 2  | 41.0          | 6.2    | 41.0    | 38.8   | 43.2   | 45.5          | 5.6   | 45.5    | 43.5   | 47.4   | 0.064    |
| Lymphocytes T CD8+ (%/L) | non-severe          | 11 | 19.0          | 5.4    | 16.3    | 15.2   | 21.8   | 24.6          | 6.4   | 25.8    | 18.9   | 27.1   | <0.001   |
|                          | severe              | 2  | 36.1          | 6.4    | 36.1    | 33.8   | 38.3   | 35.7          | 10.0  | 35.7    | 32.1   | 39.2   | 0.899    |
| NK cells (%/L)           | non-severe          | 11 | 13.1          | 9.2    | 12.3    | 7.9    | 12.8   | 12.1          | 4.0   | 12.7    | 8.9    | 14.6   | 0.620    |
|                          | severe              | 2  | 9.3           | 3.3    | 9.3     | 8.1    | 10.4   | 8.8           | 2.7   | 8.8     | 7.9    | 9.8    | 0.500    |
| Lymphocytes B (%/L)      | non-severe          | 11 | 16.0          | 6.2    | 16.3    | 12.5   | 19.2   | 9.5           | 1.9   | 9.7     | 8.1    | 10.0   | *0.006   |
|                          | severe              | 2  | 10.0          | 0.7    | 10.0    | 9.8    | 10.3   | 8.8           | 1.6   | 8.8     | 8.2    | 9.3    | 0.587    |
| T lymphocytes (k/ul)     | non-severe          | 11 | 1412.5        | 668.8  | 1384.5  | 962.8  | 1784.0 | 1938.9        | 671.0 | 1800.5  | 1485.9 | 2230.9 | 0.087    |
|                          | severe              | 2  | 3215.7        | 2115.4 | 3215.7  | 2467.8 | 3963.6 | 2099.2        | 846.0 | 2099.2  | 1800.0 | 2398.3 | 0.431    |

| Parameter               | The course of COVID | n  | Results in T0 |        |        |        |        | Results in T2 |       |        |        |        | T2 – T0  |
|-------------------------|---------------------|----|---------------|--------|--------|--------|--------|---------------|-------|--------|--------|--------|----------|
|                         |                     |    | Mean          | SD     | Median | Q1     | Q3     | Mean          | SD    | Median | Q1     | Q3     | *p< 0.05 |
| CD4+ lymphocytes (k/ul) | non-severe          | 11 | 963.4         | 472.9  | 1033.3 | 579.8  | 1317.6 | 1240.3        | 319.9 | 1196.6 | 1006.5 | 1486.0 | 0.123    |
|                         | severe              | 2  | 1537.1        | 775.7  | 1537.1 | 1262.9 | 1811.4 | 1120.3        | 266.1 | 1120.3 | 1026.2 | 1214.4 | 0.454    |
| CD8+ lymphocytes (k/ul) | non-severe          | 11 | 371.3         | 182.4  | 332.9  | 269.2  | 488.6  | 643.8         | 370.5 | 526.1  | 402.1  | 819.9  | *0.020   |
|                         | severe              | 2  | 1506.5        | 1154.2 | 1506.5 | 1098.4 | 1914.5 | 942.6         | 569.2 | 942.6  | 741.4  | 1143.8 | 0.403    |
| NK cells (k/ul)         | non-severe          | 11 | 266.1         | 321.6  | 190.6  | 138.8  | 233.7  | 297.4         | 126.0 | 328.2  | 177.0  | 395.4  | 0.738    |
|                         | severe              | 2  | 320.1         | 97.0   | 320.1  | 285.8  | 354.4  | 210.0         | 13.1  | 210.0  | 205.4  | 214.7  | 0.315    |
| B lymphocytes (k/ul)    | non-severe          | 11 | 280.7         | 85.4   | 288.9  | 238.8  | 320.6  | 229.5         | 80.5  | 232.7  | 176.3  | 295.2  | 0.094    |
|                         | severe              | 2  | 401.0         | 277.5  | 401.0  | 302.9  | 499.1  | 213.8         | 38.8  | 213.8  | 200.1  | 227.5  | 0.467    |
